# Supplementary material
Source: Research Square preprint supplement (doi:10.21203/rs.3.rs-7802107/v1)
Supplement: Supplementary file 1 [file bc7eac2b61547a4bf9f41317.pdf]

# Supplementary Methods for the Disturbed Equilibrium Index (DEI)

## 1. Indicator Normalization

All indicators for Human Pressure (H), Exogenous Stress (A), and Resilience (R) were normalized to a 0–1 scale to enable comparability across different units and magnitudes.

- **Min–Max scaling** was applied for most variables:

$$x' = \frac{x - \min(x)}{\max(x) - \min(x)}$$

- For skewed data (e.g., extraction rates with long-tailed distributions), **log-transform normalization** was used.

## 2. Weighting Scheme

Indicators within each block (H, A, R) were aggregated using weighted sums:

$$H = \sum A, w_i h_i = \sum R, u_j a_j = \sum u_k r_k$$

- **Data-driven weights:** Entropy weighting and Principal Component Analysis (PCA) were applied where sufficient data coverage existed.
- **Expert-driven weights:** Analytical Hierarchy Process (AHP) and Delphi panels informed cases with limited data.
- **Hybrid weighting:** Data-driven values were cross-validated with expert consensus.

## 3. Calibration of $\kappa$ (Kappa)

The calibration factor  $\kappa$  expresses the relative weight of exogenous stress (A) compared to human pressure (H):

$$DEI(t) = \frac{H(t) + \kappa A(t)}{R(t)}$$

- $\kappa$  was calibrated using regression optimization against historical collapse events (Lake Urmia, Aral Sea).
- In most case studies,  $\kappa \approx 1$  provided consistent results; sensitivity analysis explored  $\kappa = 0.5–1.5$ .

## 4. Threshold Classification

Thresholds for interpreting DEI values were derived using ROC analysis and historical collapse events:

- **Green (Safe):**  $DEI < 0.7$
- **Yellow (Caution):**  $0.7 \leq DEI < 1.0$
- **Orange (High Risk):**  $1.0 \leq DEI < 1.3$
- **Red (Crisis):**  $DEI \geq 1.3$

These classes represent states of systemic stress where the likelihood of ecological collapse increases with rising DEI.

## 5. Data Sources and Gaps

- **Remote sensing:** Landsat, Sentinel-2, MODIS (land cover, vegetation, water extent).
- **Hydrology:** GRACE groundwater data, national water authority statistics.
- **Climate:** SPI/SPEI drought indices, ERA5 reanalysis, ETCCDI extremes.
- **Ecology:** IUCN Red List, biodiversity surveys.
- **Governance:** National adaptation plans, budgets, participatory indices.

Where data gaps existed (e.g., resilience indicators in Lake Urmia), **proxy values** and **validated estimates** were used, always reported transparently.

## 6. Limitations

- DEI does **not predict exact timing** of ecological reactions but indicates systemic states approaching or exceeding thresholds.
- Data gaps in developing regions may introduce uncertainty; results should be interpreted as risk assessments, not deterministic forecasts.
- Calibration of  $\kappa$  may vary across ecosystems; further refinement is encouraged.

## 7. Replication Notes

- A sample dataset and code (Python script `dei_calculator.py`) are provided in the Supplementary Repository.
- Users can adapt weight schemes and  $\kappa$  to specific ecosystems.
- Replication is encouraged to test generalizability of DET/DEI across biomes.
